# Supplementary material
Source: ML conference proceedings conference paper supplement (https://proceedings.neurips.cc/paper_files/paper/2020/hash/84c578f202616448a2f80e6f56d5f16d-Abstract.html)
Supplement: Supplementary file [file 84c578f202616448a2f80e6f56d5f16d-Supplemental.pdf]

# Supplementary Materials

## A Further Specification of Experiments

Following [1], we consider a 5-way 5-shot task on both the FC100 and miniImageNet datasets, where we evaluate the model’s ability to discriminate 5 unseen classes, given only 5 labelled samples per class. We adopt Adam [15] as the optimizer for the meta outer-loop update, and adopt the cross-entropy loss to measure the error between the predicted and true labels.

### A.1 Introduction of FC100 and miniImageNet datasets

**FC100 dataset.** The FC100 dataset [23] is generated from CIFAR-100 [17], and consists of 100 classes with each class containing 600 images of size 32. Following recent work [23, 18], we split these 100 classes into 60 classes for meta-training, 20 classes for meta-validation, and 20 classes for meta-testing.

**miniImageNet dataset.** The miniImageNet dataset [30] consists of 100 classes randomly chosen from ImageNet [27], where each class contains 600 images of size  $84 \times 84$ . Following the repository [1], we partition these classes into 64 classes for meta-training, 16 classes for meta-validation, and 20 classes for meta-testing.

### A.2 Model Architectures and Hyper-Parameter Setting

We adopt the following four model architectures depending on the dataset and the geometry of the inner-loop loss. The hyper-parameter configuration for each architecture is also provided as follows.

**Case 1: FC100 dataset, strongly-convex inner-loop loss.** Following [1], we use a 4-layer CNN of four convolutional blocks, where each block sequentially consists of a  $3 \times 3$  convolution with a padding of 1 and a stride of 2, batch normalization, ReLU activation, and  $2 \times 2$  max pooling. Each convolutional layer has 64 filters. This model is trained with an inner-loop stepsize of 0.005, an outer-loop (meta) stepsize of 0.001, and a mini-batch size of  $B = 32$ . We set the regularization parameter  $\lambda$  of the  $L^2$  regularizer to be  $\lambda = 5$ .

**Case 2: FC100 dataset, nonconvex inner-loop loss.** We adopt a 5-layer CNN with the first four convolutional layers the same as in **Case 1**, followed by ReLU activation, and a full-connected layer with size of  $256 \times$  ways. This model is trained with an inner-loop stepsize of 0.04, an outer-loop (meta) stepsize of 0.003, and a mini-batch size of  $B = 32$ .

**Case 3: miniImageNet dataset, strongly-convex inner-loop loss.** Following [24], we use a 4-layer CNN of four convolutional blocks, where each block sequentially consists of a  $3 \times 3$  convolution with 32 filters, batch normalization, ReLU activation, and  $2 \times 2$  max pooling. We choose an inner-loop stepsize of 0.002, an outer-loop (meta) stepsize of 0.002, and a mini-batch size of  $B = 32$ , and set the regularization parameter  $\lambda$  of the  $L^2$  regularizer to be  $\lambda = 0.1$ .

**Case 4: miniImageNet dataset, nonconvex inner-loop loss.** We adopt a 5-layer CNN with the first four convolutional layers the same as in **Case 3**, followed by ReLU activation, and a full-connected layer with size of  $128 \times$  ways. We choose an inner-loop stepsize of 0.02, an outer-loop (meta) stepsize of 0.003, and a mini-batch size of  $B = 32$ .

### A.3 Experiments with SGD Optimizer

The experiments in Section 4.1 and Section 4.2 adopt the Adam optimizer. In this subsection, we conduct experiments using mini-batch stochastic gradient descent (SGD) on FC100 dataset. For both the strongly-convex and nonconvex cases, we choose an inner-loop stepsize of 0.05, an outer-loop (meta) stepsize of 0.05, and a mini-batch size of  $B = 32$ . The results are given in Figure 3. It can be seen that the nature of the results remains the same as those done with the Adam optimizer.

### A.4 Experiments on Comparison of ANIL and MAML

In Figure 4, we compare the computational efficiency between ANIL and MAML. For the miniImageNet dataset, we choose the inner-loop stepsize as 0.1, the outer-loop (meta) stepsize as 0.002, the

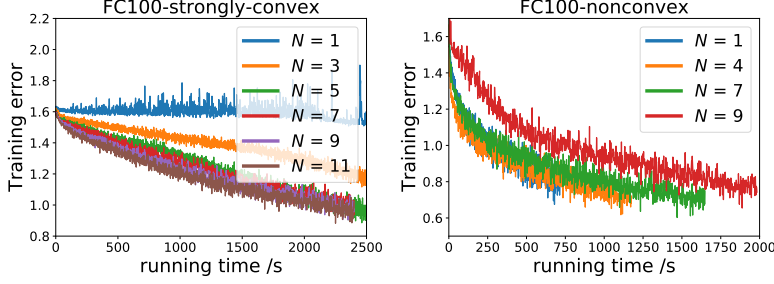

Figure 3: Convergence of ANIL with mini-batch SGD over FC100 dataset. Left plot: strongly-convex inner-loop loss; right plot: nonconvex inner-loop loss.

mini-batch size as 32, and the number of inner-loop steps as 5 for ANIL. For MAML, we choose the inner-loop stepsize as 0.5, the outer-loop stepsize as 0.003, the mini-batch size as 32, and the number of inner-loop steps as 3. For the FC100 dataset, we choose the inner-loop stepsize as 0.1, the outer-loop (meta) stepsize as 0.001, the mini-batch size as 32 for ANIL. For MAML, we choose the inner-loop stepsize as 0.5, the outer-loop stepsize as 0.001, and the mini-batch size as 32. We choose the number of inner-loop steps as 10 for ANIL and 3 for MAML. It can be seen that ANIL converges faster than MAML, as well supported by our theoretical results.

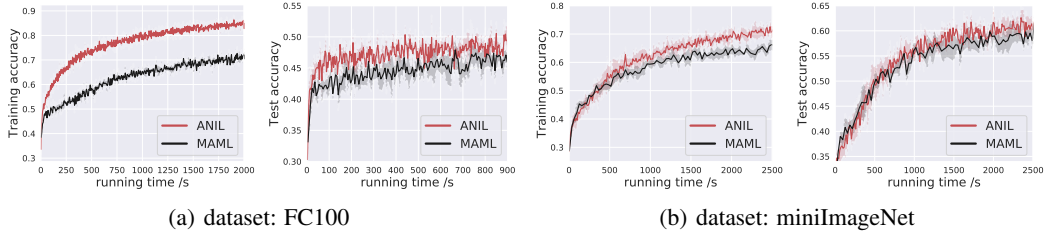

Figure 4: Computational comparison of ANIL and MAML. For each dataset, left plot: training accuracy v.s. running time; right plot: test accuracy v.s. running time.

## B Proof of Proposition 1

We first prove the form of the partial gradient  $\frac{\partial L_{\mathcal{D}_i}(w_{k,N}^i, \phi_k)}{\partial w_k}$ . Using the chain rule, we have

$$\begin{aligned} \frac{\partial L_{\mathcal{D}_i}(w_{k,N}^i, \phi_k)}{\partial w_k} &= \frac{\partial w_{k,N}^i(w_k, \phi_k)}{\partial w_k} \nabla_w L_{\mathcal{D}_i}(w_{k,N}^i, \phi_k) + \frac{\partial \phi_k}{\partial w_k} \nabla_\phi L_{\mathcal{D}_i}(w_{k,N}^i, \phi_k) \\ &= \frac{\partial w_{k,N}^i(w_k, \phi_k)}{\partial w_k} \nabla_w L_{\mathcal{D}_i}(w_{k,N}^i, \phi_k), \end{aligned} \quad (3)$$

where the last equality follows from the fact that  $\frac{\partial \phi_k}{\partial w_k} = 0$ . Recall that the gradient updates in Algorithm 1 are given by

$$w_{k,m+1}^i = w_{k,m}^i - \alpha \nabla_w L_{\mathcal{S}_i}(w_{k,m}^i, \phi_k), \quad m = 0, 1, \dots, N-1, \quad (4)$$

where  $w_{k,0}^i = w_k$  for all  $i$ . Taking derivatives w.r.t.  $w_k$  in eq. (4) yields

$$\frac{\partial w_{k,m+1}^i}{\partial w_k} = \frac{\partial w_{k,m}^i}{\partial w_k} - \alpha \frac{\partial w_{k,m}^i}{\partial w_k} \nabla_w^2 L_{\mathcal{S}_i}(w_{k,m}^i, \phi_k) - \underbrace{\alpha \frac{\partial \phi_k}{\partial w_k} \nabla_\phi \nabla_w L_{\mathcal{S}_i}(w_{k,m}^i, \phi_k)}_0. \quad (5)$$

Telescoping eq. (5) over  $m$  from 0 to  $N-1$  yields

$$\frac{\partial w_{k,N}^i}{\partial w_k} = \prod_{m=0}^{N-1} (I - \alpha \nabla_w^2 L_{\mathcal{S}_i}(w_{k,m}^i, \phi_k)),$$

which, in conjunction eq. (3), yields the first part in Proposition 1.

For the second part, using chain rule, we have

$$\frac{\partial L_{\mathcal{D}_i}(w_{k,N}^i, \phi_k)}{\partial \phi_k} = \frac{\partial w_{k,N}^i}{\partial \phi_k} \nabla_w L_{\mathcal{D}_i}(w_{k,N}^i, \phi_k) + \nabla_\phi L_{\mathcal{D}_i}(w_{k,N}^i, \phi_k). \quad (6)$$

Taking derivatives w.r.t.  $\phi_k$  in eq. (4) yields

$$\begin{aligned} \frac{\partial w_{k,m+1}^i}{\partial \phi_k} &= \frac{\partial w_{k,m}^i}{\partial \phi_k} - \alpha \left( \frac{\partial w_{k,m}^i}{\partial \phi_k} \nabla_w^2 L_{\mathcal{S}_i}(w_{k,m}^i, \phi_k) + \nabla_\phi \nabla_w L_{\mathcal{S}_i}(w_{k,m}^i, \phi_k) \right) \\ &= \frac{\partial w_{k,m}^i}{\partial \phi_k} (I - \alpha \nabla_w^2 L_{\mathcal{S}_i}(w_{k,m}^i, \phi_k)) - \alpha \nabla_\phi \nabla_w L_{\mathcal{S}_i}(w_{k,m}^i, \phi_k). \end{aligned}$$

Telescoping the above equality over  $m$  from 0 to  $N-1$  yields

$$\begin{aligned} \frac{\partial w_{k,N}^i}{\partial \phi_k} &= \frac{\partial w_{k,0}^i}{\partial \phi_k} \prod_{m=0}^{N-1} (I - \alpha \nabla_w^2 L_{\mathcal{S}_i}(w_{k,m}^i, \phi_k)) \\ &\quad - \alpha \sum_{m=0}^{N-1} \nabla_\phi \nabla_w L_{\mathcal{S}_i}(w_{k,m}^i, \phi_k) \prod_{j=m+1}^{N-1} (I - \alpha \nabla_w^2 L_{\mathcal{S}_i}(w_{k,j}^i, \phi_k)), \end{aligned}$$

which, in conjunction with the fact that  $\frac{\partial w_{k,0}^i}{\partial \phi_k} = \frac{\partial w_k}{\partial \phi_k} = 0$  and eq. (6), yields the second part.

## C Proof in Section 3.1: Strongly-Convex Inner Loop

### C.1 Auxiliary Lemma

The following lemma characterizes a bound on the difference between  $w_t^i(w_1, \phi_1)$  and  $w_t^i(w_2, \phi_2)$ , where  $w_t^i(w, \phi)$  corresponds to the  $t^{\text{th}}$  inner-loop iteration starting from the initialization point  $(w, \phi)$ .

**Lemma 1.** *Choose  $\alpha$  such that  $1 - 2\alpha\mu + \alpha^2 L^2 > 0$ . Then, for any two points  $(w_1, \phi_1), (w_2, \phi_2) \in \mathbb{R}^n$ , we have*

$$\|w_t^i(w_1, \phi_1) - w_t^i(w_2, \phi_2)\| \leq (1 - 2\alpha\mu + \alpha^2 L^2)^{\frac{t}{2}} \|w_1 - w_2\| + \frac{\alpha L \|\phi_1 - \phi_2\|}{1 - \sqrt{1 - 2\alpha\mu + \alpha^2 L^2}}.$$

*Proof.* Based on the updates in eq. (2), we have

$$\begin{aligned} w_{m+1}^i(w_1, \phi_1) - w_{m+1}^i(w_2, \phi_2) &= w_m^i(w_1, \phi_1) - w_m^i(w_2, \phi_2) \\ &\quad - \alpha (\nabla_w L_{\mathcal{S}_i}(w_m^i(w_1, \phi_1), \phi_1) - \nabla_w L_{\mathcal{S}_i}(w_m^i(w_2, \phi_2), \phi_1)) \\ &\quad + \alpha (\nabla_w L_{\mathcal{S}_i}(w_m^i(w_2, \phi_2), \phi_2) - \nabla_w L_{\mathcal{S}_i}(w_m^i(w_2, \phi_2), \phi_1)), \end{aligned}$$

which, together with the triangle inequality and Assumption 1, yields

$$\begin{aligned} &\|w_{m+1}^i(w_1, \phi_1) - w_{m+1}^i(w_2, \phi_2)\| \\ &\leq \underbrace{\|w_m^i(w_1, \phi_1) - w_m^i(w_2, \phi_2) - \alpha (\nabla_w L_{\mathcal{S}_i}(w_m^i(w_1, \phi_1), \phi_1) - \nabla_w L_{\mathcal{S}_i}(w_m^i(w_2, \phi_2), \phi_1))\|}_P \\ &\quad + \alpha L \|\phi_1 - \phi_2\|. \end{aligned} \quad (7)$$

Our next step is to upper-bound the term  $P$  in eq. (7). Note that

$$\begin{aligned} P^2 &= \|w_m^i(w_1, \phi_1) - w_m^i(w_2, \phi_2)\|^2 + \alpha^2 \|\nabla_w L_{\mathcal{S}_i}(w_m^i(w_1, \phi_1), \phi_1) - \nabla_w L_{\mathcal{S}_i}(w_m^i(w_2, \phi_2), \phi_1)\|^2 \\ &\quad - 2\alpha \left\langle w_m^i(w_1, \phi_1) - w_m^i(w_2, \phi_2), \nabla_w L_{\mathcal{S}_i}(w_m^i(w_1, \phi_1), \phi_1) - \nabla_w L_{\mathcal{S}_i}(w_m^i(w_2, \phi_2), \phi_1) \right\rangle \\ &\leq (1 + \alpha^2 L^2 - 2\alpha\mu) \|w_m^i(w_1, \phi_1) - w_m^i(w_2, \phi_2)\|^2, \end{aligned} \quad (8)$$

where the last inequality follows from the strong-convexity of the loss function  $L_{\mathcal{S}_i}(\cdot, \phi)$  that for any  $w, w'$  and  $\phi$ ,

$$\langle w - w', \nabla_w L_{\mathcal{S}_i}(w, \phi) - \nabla_w L_{\mathcal{S}_i}(w', \phi) \rangle \geq \mu \|w - w'\|^2.$$

Substituting eq. (8) into eq. (7) yields

$$\|w_{m+1}^i(w_1, \phi_1) - w_{m+1}^i(w_2, \phi_2)\| \leq \sqrt{1 + \alpha^2 L^2 - 2\alpha\mu} \|w_m^i(w_1, \phi_1) - w_m^i(w_2, \phi_2)\| + \alpha L \|\phi_1 - \phi_2\|. \quad (9)$$

Telescoping the above inequality over  $m$  from 0 to  $t - 1$  completes the proof.  $\square$

## C.2 Proof of Proposition 2

Using an approach similar to the proof of Proposition 1, we have

$$\frac{\partial L_{\mathcal{D}_i}(w_N^i, \phi)}{\partial w} = \prod_{m=0}^{N-1} (I - \alpha \nabla_w^2 L_{\mathcal{S}_i}(w_m^i, \phi)) \nabla_w L_{\mathcal{D}_i}(w_N^i, \phi). \quad (10)$$

Let  $w_m^i(w, \phi)$  denote the  $m^{\text{th}}$  inner-loop iteration starting from  $(w, \phi)$ . Then, we have

$$\begin{aligned} & \left\| \frac{\partial L_{\mathcal{D}_i}(w_N^i, \phi)}{\partial w} \Big|_{(w_1, \phi_1)} - \frac{\partial L_{\mathcal{D}_i}(w_N^i, \phi)}{\partial w} \Big|_{(w_2, \phi_2)} \right\| \\ & \leq \underbrace{\left\| \prod_{m=0}^{N-1} (I - \alpha \nabla_w^2 L_{\mathcal{S}_i}(w_m^i(w_2, \phi_2), \phi_2)) \right\| \left\| \nabla_w L_{\mathcal{D}_i}(w_N^i(w_1, \phi_1), \phi_1) - \nabla_w L_{\mathcal{D}_i}(w_N^i(w_2, \phi_2), \phi_2) \right\|}_{P} \\ & \quad + \underbrace{\left\| \prod_{m=0}^{N-1} (I - \alpha \nabla_w^2 L_{\mathcal{S}_i}(w_m^i(w_1, \phi_1), \phi_1)) \nabla_w L_{\mathcal{D}_i}(w_N^i(w_1, \phi_1), \phi_1) \right.}_{Q} \\ & \quad \left. - \prod_{m=0}^{N-1} (I - \alpha \nabla_w^2 L_{\mathcal{S}_i}(w_m^i(w_2, \phi_2), \phi_2)) \nabla_w L_{\mathcal{D}_i}(w_N^i(w_1, \phi_1), \phi_1) \right\|, \end{aligned} \quad (11)$$

where  $w_m^i(w, \phi)$  is obtained through the following gradient descent steps

$$w_{t+1}^i(w, \phi) = w_t^i(w, \phi) - \alpha \nabla_w L_{\mathcal{S}_i}(w_t^i(w, \phi), \phi), \quad t = 0, \dots, m-1 \text{ and } w_0^i(w, \phi) = w. \quad (12)$$

We next upper-bound the term  $P$  in eq. (11). Based on the strongly-convexity of the function  $L_{\mathcal{S}_i}(\cdot, \phi)$ , we have  $\|I - \alpha \nabla_w^2 L_{\mathcal{S}_i}(\cdot, \phi)\| \leq 1 - \alpha\mu$ , and hence

$$\begin{aligned} P & \leq (1 - \alpha\mu)^N \left\| \nabla_w L_{\mathcal{D}_i}(w_N^i(w_1, \phi_1), \phi_1) - \nabla_w L_{\mathcal{D}_i}(w_N^i(w_2, \phi_2), \phi_2) \right\| \\ & \stackrel{(i)}{\leq} (1 - \alpha\mu)^N L (\|w_N^i(w_1, \phi_1) - w_N^i(w_2, \phi_2)\| + \|\phi_1 - \phi_2\|) \\ & \stackrel{(ii)}{\leq} (1 - \alpha\mu)^N L \left( (1 - 2\alpha\mu + \alpha^2 L^2)^{\frac{N}{2}} \|w_1 - w_2\| + \frac{\alpha L \|\phi_1 - \phi_2\|}{1 - \sqrt{1 - 2\alpha\mu + \alpha^2 L^2}} + \|\phi_1 - \phi_2\| \right) \\ & \stackrel{(iii)}{\leq} (1 - \alpha\mu)^{\frac{3N}{2}} L \|w_1 - w_2\| + (1 - \alpha\mu)^N L \left( \frac{2L}{\mu} + 1 \right) \|\phi_1 - \phi_2\|, \end{aligned} \quad (13)$$

where (i) follows from Assumption 1, (ii) follows from Lemma 1, and (iii) follows from the fact that  $\alpha\mu = \frac{\mu^2}{L^2} = \alpha^2 L^2$  and  $\sqrt{1-x} \leq 1 - \frac{1}{2}x$ .

To upper-bound the term  $Q$  in eq. (11), we have

$$Q \leq M \underbrace{\left\| \prod_{m=0}^{N-1} (I - \alpha \nabla_w^2 L_{\mathcal{S}_i}(w_m^i(w_1, \phi_1), \phi_1)) - \prod_{m=0}^{N-1} (I - \alpha \nabla_w^2 L_{\mathcal{S}_i}(w_m^i(w_2, \phi_2), \phi_2)) \right\|}_{P_{N-1}}. \quad (14)$$

To upper-bound  $P_{N-1}$  in eq. (14), we define a more general quantity  $P_t$  by replacing  $N - 1$  with  $t$  in eq. (14). Using the triangle inequality, we have

$$\begin{aligned} P_t & \leq \alpha(1 - \alpha\mu)^t \left\| \nabla_w^2 L_{\mathcal{S}_i}(w_t^i(w_1, \phi_1), \phi_1) - \nabla_w^2 L_{\mathcal{S}_i}(w_t^i(w_2, \phi_2), \phi_2) \right\| + (1 - \alpha\mu) P_{t-1} \\ & \leq (1 - \alpha\mu) P_{t-1} + \alpha\rho(1 - \alpha\mu)^{\frac{3t}{2}} \|w_1 - w_2\| + (1 - \alpha\mu)^t \alpha\rho \left( \frac{2L}{\mu} + 1 \right) \|\phi_1 - \phi_2\|. \end{aligned} \quad (15)$$

Telescoping eq. (15) over  $t$  from 1 to  $N - 1$  yields

$$P_{N-1} \leq (1 - \alpha\mu)^{N-1} P_0 + \sum_{t=1}^{N-1} \alpha\rho(1 - \alpha\mu)^{\frac{3t}{2}} \|w_1 - w_2\| (1 - \alpha\mu)^{N-1-t} \\ + \sum_{t=1}^{N-1} (1 - \alpha\mu)^t \alpha\rho \left( \frac{2L}{\mu} + 1 \right) \|\phi_1 - \phi_2\| (1 - \alpha\mu)^{N-1-t},$$

which, in conjunction with  $P_0 \leq \alpha\rho(\|w_1 - w_2\| + \|\phi_1 - \phi_2\|)$ , yields

$$P_{N-1} \leq (1 - \alpha\mu)^{N-1} \alpha\rho(\|w_1 - w_2\| + \|\phi_1 - \phi_2\|) + \alpha\rho\|w_1 - w_2\| (1 - \alpha\mu)^{N-1} \frac{\sqrt{1 - \alpha\mu}}{1 - \sqrt{1 - \alpha\mu}} \\ + \alpha\rho \left( \frac{2L}{\mu} + 1 \right) \|\phi_1 - \phi_2\| (N - 1) (1 - \alpha\mu)^{N-1} \\ \leq \frac{2\rho}{\mu} (1 - \alpha\mu)^{N-1} \|w_1 - w_2\| + \alpha\rho \left( \frac{2L}{\mu} + 1 \right) \|\phi_1 - \phi_2\| N (1 - \alpha\mu)^{N-1},$$

which, in conjunction with eq. (14), yields

$$Q \leq \frac{2\rho M}{\mu} (1 - \alpha\mu)^{N-1} \|w_1 - w_2\| + \alpha\rho M \left( \frac{2L}{\mu} + 1 \right) \|\phi_1 - \phi_2\| N (1 - \alpha\mu)^{N-1}. \quad (16)$$

Substituting eq. (13) and eq. (16) into eq. (11) yields

$$\left\| \frac{\partial L_{\mathcal{D}_i}(w_N^i, \phi)}{\partial w} \Big|_{(w_1, \phi_1)} - \frac{\partial L_{\mathcal{D}_i}(w_N^i, \phi)}{\partial w} \Big|_{(w_2, \phi_2)} \right\| \\ \leq \left( (1 - \alpha\mu)^{\frac{3N}{2}} L + \frac{2\rho M}{\mu} (1 - \alpha\mu)^{N-1} \right) \|w_1 - w_2\| \\ + \left( (1 - \alpha\mu)^N L + \alpha\rho M N (1 - \alpha\mu)^{N-1} \right) \left( \frac{2L}{\mu} + 1 \right) \|\phi_1 - \phi_2\|. \quad (17)$$

Based on the definition  $L^{meta}(w, \phi) = \mathbb{E}_i L_{\mathcal{D}_i}(w_N^i, \phi)$  and using the Jensen's inequality, we have

$$\left\| \frac{\partial L^{meta}(w, \phi)}{\partial w} \Big|_{(w_1, \phi_1)} - \frac{\partial L^{meta}(w, \phi)}{\partial w} \Big|_{(w_2, \phi_2)} \right\| \\ \leq \mathbb{E}_i \left\| \frac{\partial L_{\mathcal{D}_i}(w_N^i, \phi)}{\partial w} \Big|_{(w_1, \phi_1)} - \frac{\partial L_{\mathcal{D}_i}(w_N^i, \phi)}{\partial w} \Big|_{(w_2, \phi_2)} \right\|. \quad (18)$$

Combining eq. (17) and eq. (18) completes the proof of the first item.

We next prove the Lipschitz property of the partial gradient  $\frac{\partial L_{\mathcal{D}_i}(w_N^i, \phi)}{\partial \phi}$ . For notational convenience, we define several quantities below.

$$Q_m(w, \phi) = \nabla_\phi \nabla_w L_{\mathcal{S}_i}(w_m^i(w, \phi), \phi), \quad U_m(w, \phi) = \prod_{j=m+1}^{N-1} (I - \alpha \nabla_w^2 L_{\mathcal{S}_i}(w_j^i(w, \phi), \phi)), \\ V_m(w, \phi) = \nabla_w L_{\mathcal{D}_i}(w_N^i(w, \phi), \phi), \quad (19)$$

where we let  $w_m^i(w, \phi)$  denote the  $m^{th}$  inner-loop iteration starting from  $(w, \phi)$ . Using an approach similar to the proof for Proposition 1, we have

$$\frac{\partial L_{\mathcal{D}_i}(w_N^i, \phi)}{\partial \phi} = -\alpha \sum_{m=0}^{N-1} \nabla_\phi \nabla_w L_{\mathcal{S}_i}(w_m^i, \phi) \prod_{j=m+1}^{N-1} (I - \alpha \nabla_w^2 L_{\mathcal{S}_i}(w_j^i, \phi)) \nabla_w L_{\mathcal{D}_i}(w_N^i, \phi) \\ + \nabla_\phi L_{\mathcal{D}_i}(w_N^i, \phi). \quad (20)$$

Then, we have

$$\left\| \frac{\partial L_{\mathcal{D}_i}(w_N^i, \phi)}{\partial \phi} \Big|_{(w_1, \phi_1)} - \frac{\partial L_{\mathcal{D}_i}(w_N^i, \phi)}{\partial \phi} \Big|_{(w_2, \phi_2)} \right\| \\ \leq \alpha \sum_{m=0}^{N-1} \|Q_m(w_1, \phi_1) U_m(w_1, \phi_1) V_m(w_1, \phi_1) - Q_m(w_2, \phi_2) U_m(w_2, \phi_2) V_m(w_2, \phi_2)\| \\ + \|\nabla_\phi L_{\mathcal{D}_i}(w_N^i(w_1, \phi_1), \phi_1) - \nabla_\phi L_{\mathcal{D}_i}(w_N^i(w_2, \phi_2), \phi_2)\|. \quad (21)$$

Using the triangle inequality, we have

$$\begin{aligned}
& \|Q_m(w_1, \phi_1)U_m(w_1, \phi_1)V_m(w_1, \phi_1) - Q_m(w_2, \phi_2)U_m(w_2, \phi_2)V_m(w_2, \phi_2)\| \\
& \leq \underbrace{\|Q_m(w_1, \phi_1) - Q_m(w_2, \phi_2)\| \|U_m(w_1, \phi_1)\| \|V_m(w_1, \phi_1)\|}_{R_1} \\
& \quad + \underbrace{\|Q_m(w_2, \phi_2)\| \|U_m(w_1, \phi_1) - U_m(w_2, \phi_2)\| \|V_m(w_1, \phi_1)\|}_{R_2} \\
& \quad + \underbrace{\|Q_m(w_2, \phi_2)\| \|U_m(w_2, \phi_2)\| \|V_m(w_1, \phi_1) - V_m(w_2, \phi_2)\|}_{R_3}. \tag{22}
\end{aligned}$$

Combining eq. (21) and eq. (22), we have

$$\begin{aligned}
& \left\| \frac{\partial L_{\mathcal{D}_i}(w_N^i, \phi)}{\partial \phi} \Big|_{(w_1, \phi_1)} - \frac{\partial L_{\mathcal{D}_i}(w_N^i, \phi)}{\partial \phi} \Big|_{(w_2, \phi_2)} \right\| \\
& \leq \alpha \sum_{m=0}^{N-1} (R_1 + R_2 + R_3) + \|\nabla_{\phi} L_{\mathcal{D}_i}(w_N^i(w_1, \phi_1), \phi_1) - \nabla_{\phi} L_{\mathcal{D}_i}(w_N^i(w_2, \phi_2), \phi_2)\|. \tag{23}
\end{aligned}$$

To upper-bound  $R_1$ , we have

$$\begin{aligned}
R_1 & \leq \tau (\|w_m^i(w_1, \phi_1) - w_m^i(w_2, \phi_2)\| + \|\phi_1 - \phi_2\|) (1 - \alpha\mu)^{N-m-1} M \\
& \leq \tau M (1 - \alpha\mu)^{N-\frac{m}{2}-1} \|w_1 - w_2\| + \tau M \left( \frac{2L}{\mu} + 1 \right) (1 - \alpha\mu)^{N-m-1} \|\phi_1 - \phi_2\|, \tag{24}
\end{aligned}$$

where the second inequality follows from Lemma 1.

For  $R_2$ , based on Assumptions 1 and 2, we have

$$R_2 \leq LM \|U_m(w_1, \phi_1) - U_m(w_2, \phi_2)\|. \tag{25}$$

Using the definitions of  $U_m(w_1, \phi_1)$  and  $U_m(w_2, \phi_2)$  in eq. (19) and using the triangle inequality, we have

$$\begin{aligned}
& \|U_m(w_1, \phi_1) - U_m(w_2, \phi_2)\| \\
& \leq \alpha \|\nabla_w^2 L_{\mathcal{S}_i}(w_{m+1}^i(w_1, \phi_1), \phi_1) - \nabla_w^2 L_{\mathcal{S}_i}(w_{m+1}^i(w_2, \phi_2), \phi_2)\| \|U_{m+1}(w_1, \phi_1)\| \\
& \quad + \|I - \alpha \nabla_w^2 L_{\mathcal{S}_i}(w_{m+1}^i(w_1, \phi_1), \phi_1)\| \|U_{m+1}(w_1, \phi_1) - U_{m+1}(w_2, \phi_2)\| \\
& \leq \alpha \rho (1 - \alpha\mu)^{N-m-2} (\|w_{m+1}^i(w_1, \phi_1) - w_{m+1}^i(w_2, \phi_2)\| + \|\phi_1 - \phi_2\|) \\
& \quad + (1 - \alpha\mu) \|U_{m+1}(w_1, \phi_1) - U_{m+1}(w_2, \phi_2)\| \\
& \leq \alpha \rho (1 - \alpha\mu)^{N-m-2} \left( (1 - \alpha\mu)^{\frac{m+1}{2}} \|w_1 - w_2\| + \left( \frac{2L}{\mu} + 1 \right) \|\phi_1 - \phi_2\| \right) \\
& \quad + (1 - \alpha\mu) \|U_{m+1}(w_1, \phi_1) - U_{m+1}(w_2, \phi_2)\|,
\end{aligned}$$

where the last inequality follows from Lemma 1. Telescoping the above inequality over  $m$  yields

$$\begin{aligned}
& \|U_m(w_1, \phi_1) - U_m(w_2, \phi_2)\| \\
& \leq (1 - \alpha\mu)^{N-m-2} \|U_{N-2}(w_1, \phi_1) - U_{N-2}(w_2, \phi_2)\| \\
& \quad + \sum_{t=0}^{N-m-3} (1 - \alpha\mu)^t \alpha \rho (1 - \alpha\mu)^{N-m-t-2} \left( (1 - \alpha\mu)^{\frac{m+t+1}{2}} \|w_1 - w_2\| + \left( \frac{2L}{\mu} + 1 \right) \|\phi_1 - \phi_2\| \right),
\end{aligned}$$

which, in conjunction with eq. (19), yields

$$\begin{aligned}
\|U_m(w_1, \phi_1) - U_m(w_2, \phi_2)\| & \leq \left( \frac{\alpha \rho}{1 - \alpha\mu} + \frac{2\rho}{\mu} \right) (1 - \alpha\mu)^{N-1-\frac{m}{2}} \|w_1 - w_2\| \\
& \quad + \alpha(N-1-m) \left( \rho + \frac{2\rho L}{\mu} \right) (1 - \alpha\mu)^{N-2-m} \|\phi_1 - \phi_2\|. \tag{26}
\end{aligned}$$

Combining eq. (25) and eq. (26) yields

$$R_2 \leq LM \left( \frac{\alpha\rho}{1-\alpha\mu} + \frac{2\rho}{\mu} \right) (1-\alpha\mu)^{N-1-\frac{m}{2}} \|w_1 - w_2\| \\ + \alpha LM(N-1-m) \left( \rho + \frac{2\rho L}{\mu} \right) (1-\alpha\mu)^{N-2-m} \|\phi_1 - \phi_2\|. \quad (27)$$

For  $R_3$ , using the triangle inequality, we have

$$R_3 \leq L(1-\alpha\mu)^{N-m-1} L(\|w_N^i(w_1, \phi_1) - w_N^i(w_2, \phi_2)\| + \|\phi_1 - \phi_2\|) \\ \leq L^2(1-\alpha\mu)^{\frac{3N}{2}-m-1} \|w_1 - w_2\| + L^2 \left( \frac{2L}{\mu} + 1 \right) (1-\alpha\mu)^{N-1-m} \|\phi_1 - \phi_2\|. \quad (28)$$

where the last inequality follows from Lemma 1.

Combine  $R_1$ ,  $R_2$  and  $R_3$  in eq. (24), eq. (27) and eq. (28), we have

$$\sum_{m=0}^{N-1} (R_1 + R_2 + R_3) \leq \frac{2\tau M}{\alpha\mu} (1-\alpha\mu)^{\frac{N-1}{2}} \|w_1 - w_2\| + \frac{\tau M}{\alpha\mu} \left( \frac{2L}{\mu} + 1 \right) \|\phi_1 - \phi_2\| \\ + \frac{2LM}{\alpha\mu} \left( \frac{\alpha\rho}{1-\alpha\mu} + \frac{2\rho}{\mu} \right) (1-\alpha\mu)^{\frac{N-1}{2}} \|w_1 - w_2\| + \frac{\alpha LM}{\alpha^2 \mu^2} \left( \rho + \frac{2\rho L}{\mu} \right) \|\phi_1 - \phi_2\| \\ + \frac{L^2}{\alpha\mu} (1-\alpha\mu)^{\frac{N}{2}} \|w_1 - w_2\| + \frac{L^2}{\alpha\mu} \left( \frac{2L}{\mu} + 1 \right) \|\phi_1 - \phi_2\|. \quad (29)$$

In addition, note that

$$\|\nabla_{\phi} L_{\mathcal{D}_i}(w_N^i(w_1, \phi_1), \phi_1) - \nabla_{\phi} L_{\mathcal{D}_i}(w_N^i(w_2, \phi_2), \phi_2)\| \\ \leq (1-\alpha\mu)^{\frac{N}{2}} L \|w_1 - w_2\| + L \left( \frac{2L}{\mu} + 1 \right) \|\phi_1 - \phi_2\|. \quad (30)$$

Combining eq. (23), eq. (29), and eq. (30) yields

$$\left\| \frac{\partial L_{\mathcal{D}_i}(w_N^i, \phi)}{\partial \phi} \Big|_{(w_1, \phi_1)} - \frac{\partial L_{\mathcal{D}_i}(w_N^i, \phi)}{\partial \phi} \Big|_{(w_2, \phi_2)} \right\| \\ \leq \left( L + \frac{2\tau M}{\mu} + \frac{2LM}{\mu} \left( \frac{\alpha\rho}{1-\alpha\mu} + \frac{2\rho}{\mu} \right) + \frac{L^2}{\mu} \right) (1-\alpha\mu)^{\frac{N-1}{2}} \|w_1 - w_2\| \\ + \left( L + \frac{\tau M}{\mu} + \frac{LM\rho}{\mu^2} + \frac{L^2}{\mu} \right) \left( \frac{2L}{\mu} + 1 \right) \|\phi_1 - \phi_2\|, \quad (31)$$

which, using an approach similar to eq. (18), completes the proof.

### C.3 Proof of Theorem 1

For notational convenience, we define

$$g_w^i(k) = \frac{\partial L_{\mathcal{D}_i}(w_{k,N}^i, \phi_k)}{\partial w_k}, \quad g_{\phi}^i(k) = \frac{\partial L_{\mathcal{D}_i}(w_{k,N}^i, \phi_k)}{\partial \phi_k}, \\ L_w = (1-\alpha\mu)^{\frac{3N}{2}} L + \frac{2\rho M}{\mu} (1-\alpha\mu)^{N-1}, \quad L'_w = \left( L + \alpha\rho MN \right) (1-\alpha\mu)^{N-1} \left( \frac{2L}{\mu} + 1 \right), \\ L_{\phi} = \left( L + \frac{2\tau M}{\mu} + \frac{2LM}{\mu} \left( \frac{\alpha\rho}{1-\alpha\mu} + \frac{2\rho}{\mu} \right) + \frac{L^2}{\mu} \right) (1-\alpha\mu)^{\frac{N-1}{2}}, \\ L'_{\phi} = \left( L + \frac{\tau M}{\mu} + \frac{LM\rho}{\mu^2} + \frac{L^2}{\mu} \right) \left( \frac{2L}{\mu} + 1 \right). \quad (32)$$

Then, the updates of Algorithm 1 are given by

$$w_{k+1} = w_k - \frac{\beta_w}{B} \sum_{i \in \mathcal{B}_k} g_w^i(k) \quad \text{and} \quad \phi_{k+1} = \phi_k - \frac{\beta_{\phi}}{B} \sum_{i \in \mathcal{B}_k} g_{\phi}^i(k). \quad (33)$$

Based on the smoothness properties established in eq. (17) and eq. (31) in the proof of Proposition 2, we have

$$\begin{aligned} L^{meta}(w_{k+1}, \phi_k) &\leq L^{meta}(w_k, \phi_k) + \left\langle \frac{\partial L^{meta}(w_k, \phi_k)}{\partial w_k}, w_{k+1} - w_k \right\rangle + \frac{L_w}{2} \|w_{k+1} - w_k\|^2, \\ L^{meta}(w_{k+1}, \phi_{k+1}) &\leq L^{meta}(w_{k+1}, \phi_k) + \left\langle \frac{\partial L^{meta}(w_{k+1}, \phi_k)}{\partial \phi_k}, \phi_{k+1} - \phi_k \right\rangle + \frac{L'_\phi}{2} \|\phi_{k+1} - \phi_k\|^2. \end{aligned}$$

Adding the above two inequalities, we have

$$\begin{aligned} L^{meta}(w_{k+1}, \phi_{k+1}) &\leq L^{meta}(w_k, \phi_k) + \left\langle \frac{\partial L^{meta}(w_k, \phi_k)}{\partial w_k}, w_{k+1} - w_k \right\rangle + \frac{L_w}{2} \|w_{k+1} - w_k\|^2 \\ &\quad + \left\langle \frac{\partial L^{meta}(w_k, \phi_k)}{\partial \phi_k}, \phi_{k+1} - \phi_k \right\rangle + \frac{L'_\phi}{2} \|\phi_{k+1} - \phi_k\|^2 \\ &\quad + \left\langle \frac{\partial L^{meta}(w_{k+1}, \phi_k)}{\partial \phi_k} - \frac{\partial L^{meta}(w_k, \phi_k)}{\partial \phi_k}, \phi_{k+1} - \phi_k \right\rangle. \end{aligned} \quad (34)$$

Based on the Cauchy-Schwarz inequality, we have

$$\begin{aligned} &\left\langle \frac{\partial L^{meta}(w_{k+1}, \phi_k)}{\partial \phi_k} - \frac{\partial L^{meta}(w_k, \phi_k)}{\partial \phi_k}, \phi_{k+1} - \phi_k \right\rangle \\ &\leq L_\phi \|w_{k+1} - w_k\| \|\phi_{k+1} - \phi_k\| \\ &\leq \frac{L_\phi}{2} \|w_{k+1} - w_k\|^2 + \frac{L_\phi}{2} \|\phi_{k+1} - \phi_k\|^2. \end{aligned} \quad (35)$$

Combining eq. (34) and eq. (35), we have

$$\begin{aligned} L^{meta}(w_{k+1}, \phi_{k+1}) &\leq L^{meta}(w_k, \phi_k) + \left\langle \frac{\partial L^{meta}(w_k, \phi_k)}{\partial w_k}, w_{k+1} - w_k \right\rangle + \frac{L_w + L_\phi}{2} \|w_{k+1} - w_k\|^2 \\ &\quad + \left\langle \frac{\partial L^{meta}(w_k, \phi_k)}{\partial \phi_k}, \phi_{k+1} - \phi_k \right\rangle + \frac{L_\phi + L'_\phi}{2} \|\phi_{k+1} - \phi_k\|^2, \end{aligned}$$

which, in conjunction with the updates in eq. (33), yields

$$\begin{aligned} &L^{meta}(w_{k+1}, \phi_{k+1}) \\ &\leq L^{meta}(w_k, \phi_k) - \left\langle \frac{\partial L^{meta}(w_k, \phi_k)}{\partial w_k}, \frac{\beta_w}{B} \sum_{i \in \mathcal{B}_k} g_w^i(k) \right\rangle + \frac{L_w + L_\phi}{2} \left\| \frac{\beta_w}{B} \sum_{i \in \mathcal{B}_k} g_w^i(k) \right\|^2 \\ &\quad - \left\langle \frac{\partial L^{meta}(w_k, \phi_k)}{\partial \phi_k}, \frac{\beta_\phi}{B} \sum_{i \in \mathcal{B}_k} g_\phi^i(k) \right\rangle + \frac{L_\phi + L'_\phi}{2} \left\| \frac{\beta_\phi}{B} \sum_{i \in \mathcal{B}_k} g_\phi^i(k) \right\|^2. \end{aligned} \quad (36)$$

Let  $\mathbb{E}_k = \mathbb{E}(\cdot | w_k, \phi_k)$ . Then, conditioning on  $w_k, \phi_k$ , and taking expectation over eq. (36), we have

$$\begin{aligned} \mathbb{E}_k L^{meta}(w_{k+1}, \phi_{k+1}) &\stackrel{(i)}{\leq} L^{meta}(w_k, \phi_k) - \beta_w \left\| \frac{\partial L^{meta}(w_k, \phi_k)}{\partial w_k} \right\|^2 + \frac{L_w + L_\phi}{2} \mathbb{E}_k \left\| \frac{\beta_w}{B} \sum_{i \in \mathcal{B}_k} g_w^i(k) \right\|^2 \\ &\quad - \beta_\phi \left\| \frac{\partial L^{meta}(w_k, \phi_k)}{\partial \phi_k} \right\|^2 + \frac{L_\phi + L'_\phi}{2} \mathbb{E}_k \left\| \frac{\beta_\phi}{B} \sum_{i \in \mathcal{B}_k} g_\phi^i(k) \right\|^2 \\ &\leq L^{meta}(w_k, \phi_k) - \beta_w \left\| \frac{\partial L^{meta}(w_k, \phi_k)}{\partial w_k} \right\|^2 + \frac{(L_w + L_\phi) \beta_w^2}{2B} \mathbb{E}_k \|g_w^i(k)\|^2 \\ &\quad + \frac{L_\phi + L_w}{2} \beta_w^2 \left\| \frac{\partial L^{meta}(w_k, \phi_k)}{\partial w_k} \right\|^2 - \beta_\phi \left\| \frac{\partial L^{meta}(w_k, \phi_k)}{\partial \phi_k} \right\|^2 \\ &\quad + \frac{L_\phi + L'_\phi}{2} \left( \frac{\beta_\phi^2}{B} \mathbb{E}_k \|g_\phi^i(k)\|^2 + \beta_\phi^2 \left\| \frac{\partial L^{meta}(w_k, \phi_k)}{\partial \phi_k} \right\|^2 \right), \end{aligned} \quad (37)$$

where (i) follows from the fact that  $\mathbb{E}_k g_w^i(k) = \frac{\partial L^{meta}(w_k, \phi_k)}{\partial w_k}$  and  $\mathbb{E}_k g_\phi^i(k) = \frac{\partial L^{meta}(w_k, \phi_k)}{\partial \phi_k}$ .



Our next step is to upper-bound  $\mathbb{E}_k \|g_w^i(k)\|^2$  and  $\mathbb{E}_k \|g_\phi^i(k)\|^2$  in eq. (37). Based on the definitions of  $g_w^i(k)$  in eq. (32) and using the explicit forms of the meta gradients in Proposition 1, we have

$$\begin{aligned} \mathbb{E}_k \|g_w^i(k)\|^2 &\leq \mathbb{E}_k \left\| \prod_{m=0}^{N-1} (I - \alpha \nabla_w^2 L_{S_i}(w_{k,m}^i, \phi_k)) \nabla_w L_{\mathcal{D}_i}(w_{k,N}^i, \phi_k) \right\|^2 \\ &\leq (1 - \alpha\mu)^{2N} M^2. \end{aligned} \quad (38)$$

Using an approach similar to eq. (38), we have

$$\begin{aligned} \mathbb{E}_k \|g_\phi^i(k)\|^2 &\leq 2\mathbb{E}_k \left\| \alpha \sum_{m=0}^{N-1} \nabla_\phi \nabla_w L_{S_i}(w_{k,m}^i, \phi_k) \prod_{j=m+1}^{N-1} (I - \alpha \nabla_w^2 L_{S_i}(w_{k,j}^i, \phi_k)) \nabla_w L_{\mathcal{D}_i}(w_{k,N}^i, \phi_k) \right\|^2 \\ &\quad + 2\|\nabla_\phi L_{\mathcal{D}_i}(w_{k,N}^i, \phi_k)\|^2 \\ &\leq 2\alpha^2 L^2 M^2 \mathbb{E}_k \left( \sum_{m=0}^{N-1} (1 - \alpha\mu)^{N-1-m} \right)^2 + 2M^2 \\ &< \frac{2L^2 M^2}{\mu^2} + 2M^2 < 2M^2 \left( \frac{L^2}{\mu^2} + 1 \right). \end{aligned} \quad (39)$$

Substituting eq. (38) and eq. (39) into eq. (37) yields

$$\begin{aligned} \mathbb{E}_k L^{meta}(w_{k+1}, \phi_{k+1}) &\leq L^{meta}(w_k, \phi_k) - \left( \beta_w - \frac{L_w + L_\phi}{2} \beta_w^2 \right) \left\| \frac{\partial L^{meta}(w_k, \phi_k)}{\partial w_k} \right\|^2 \\ &\quad + \frac{(L_w + L_\phi) \beta_w^2}{2B} (1 - \alpha\mu)^{2N} M^2 - \left( \beta_\phi - \frac{L_\phi + L'_\phi}{2} \beta_\phi^2 \right) \left\| \frac{\partial L^{meta}(w_k, \phi_k)}{\partial \phi_k} \right\|^2 \\ &\quad + \frac{(L_\phi + L'_\phi) \beta_\phi^2}{B} M^2 \left( \frac{L^2}{\mu^2} + 1 \right). \end{aligned} \quad (40)$$

Let  $\beta_w = \frac{1}{L_w + L_\phi}$  and  $\beta_\phi = \frac{1}{L_\phi + L'_\phi}$ . Then, unconditioning on  $w_k$  and  $\phi_k$  and telescoping eq. (40) over  $k$  from 0 to  $K - 1$  yield

$$\begin{aligned} &\frac{\beta_w}{2} \frac{1}{K} \sum_{k=0}^{K-1} \mathbb{E} \left\| \frac{\partial L^{meta}(w_k, \phi_k)}{\partial w_k} \right\|^2 + \frac{\beta_\phi}{2} \frac{1}{K} \sum_{k=0}^{K-1} \mathbb{E} \left\| \frac{\partial L^{meta}(w_k, \phi_k)}{\partial \phi_k} \right\|^2 \\ &\leq \frac{L^{meta}(w_0, \phi_0) - \min_{w, \phi} L^{meta}(w, \phi)}{K} + \frac{\beta_w}{2B} (1 - \alpha\mu)^{2N} M^2 + \frac{\beta_\phi}{B} M^2 \left( \frac{L^2}{\mu^2} + 1 \right). \end{aligned} \quad (41)$$

Let  $\Delta = L^{meta}(w_0, \phi_0) - \min_{w, \phi} L^{meta}(w, \phi)$  and let  $\xi$  be chosen from  $\{0, \dots, K - 1\}$  uniformly at random. Then, we have

$$\begin{aligned} \mathbb{E} \left\| \frac{\partial L^{meta}(w_\xi, \phi_\xi)}{\partial w_\xi} \right\|^2 &\leq \frac{2\Delta(L_w + L_\phi)}{K} + \frac{(1 - \alpha\mu)^{2N} M^2}{B} + \frac{L_w + L_\phi}{L_\phi + L'_\phi} \frac{2}{B} M^2 \left( \frac{L^2}{\mu^2} + 1 \right), \\ \mathbb{E} \left\| \frac{\partial L^{meta}(w_\xi, \phi_\xi)}{\partial \phi_\xi} \right\|^2 &\leq \frac{2\Delta(L_\phi + L'_\phi)}{K} + \frac{L_\phi + L'_\phi}{L_w + L_\phi} \frac{1}{B} (1 - \alpha\mu)^{2N} M^2 + \frac{2}{B} M^2 \left( \frac{L^2}{\mu^2} + 1 \right), \end{aligned}$$

which, in conjunction with the definitions of  $L_\phi$ ,  $L'_\phi$  and  $L_w$  in eq. (32) and  $\alpha = \frac{\mu}{L^2}$ , yields

$$\begin{aligned} \mathbb{E} \left\| \frac{\partial L^{meta}(w_\xi, \phi_\xi)}{\partial w_\xi} \right\|^2 &\leq \mathcal{O} \left( \frac{\frac{1}{\mu^2} \left(1 - \frac{\mu^2}{L^2}\right)^{\frac{N}{2}}}{K} + \frac{\frac{1}{\mu} \left(1 - \frac{\mu^2}{L^2}\right)^{\frac{N}{2}}}{B} \right), \\ \mathbb{E} \left\| \frac{\partial L^{meta}(w_\xi, \phi_\xi)}{\partial \phi_\xi} \right\|^2 &\leq \mathcal{O} \left( \frac{\frac{1}{\mu^2} \left(1 - \frac{\mu^2}{L^2}\right)^{\frac{N}{2}}}{K} + \frac{1}{\mu^3} + \frac{\frac{1}{\mu} \left(1 - \frac{\mu^2}{L^2}\right)^{\frac{3N}{2}}}{B} + \frac{1}{\mu^2} \right). \end{aligned}$$

To achieve an  $\epsilon$ -stationary point, i.e.,  $\mathbb{E} \left\| \frac{\partial L^{meta}(w, \phi)}{\partial w} \right\|^2 < \epsilon$ ,  $\mathbb{E} \left\| \frac{\partial L^{meta}(w, \phi)}{\partial w} \right\|^2 < \epsilon$ , ANIL requires at most

$$\begin{aligned} KBN &= \mathcal{O} \left( \frac{L^2}{\mu^2} \left( 1 - \frac{\mu^2}{L^2} \right)^{\frac{N}{2}} + \frac{L^3}{\mu^3} \right) \left( \frac{L}{\mu} \left( 1 - \frac{\mu^2}{L^2} \right)^{\frac{3N}{2}} + \frac{L^2}{\mu^2} \right) N \epsilon^{-2} \\ &\leq \mathcal{O} \left( \frac{N}{\mu^4} \left( 1 - \frac{\mu^2}{L^2} \right)^{\frac{N}{2}} + \frac{N}{\mu^5} \right) \epsilon^{-2} \end{aligned}$$

gradient evaluations in  $w$ ,  $KB = \mathcal{O} \left( \mu^{-4} \left( 1 - \frac{\mu^2}{L^2} \right)^{N/2} + \mu^{-5} \right) \epsilon^{-2}$  gradient evaluations in  $\phi$ , and  $KBN = \mathcal{O} \left( \frac{N}{\mu^4} \left( 1 - \frac{\mu^2}{L^2} \right)^{N/2} + \frac{N}{\mu^5} \right) \epsilon^{-2}$  evaluations of second-order derivatives.

## D Proof in Section 3.2: Nonconvex Inner Loop

### D.1 Proof of Proposition 3

Based on the explicit forms of the meta gradient in eq. (10) and using an approach similar to eq. (11), we have

$$\begin{aligned} & \left\| \frac{\partial L_{\mathcal{D}_i}(w_N^i, \phi)}{\partial w} \Big|_{(w_1, \phi_1)} - \frac{\partial L_{\mathcal{D}_i}(w_N^i, \phi)}{\partial w} \Big|_{(w_2, \phi_2)} \right\| \\ &= \left\| \prod_{m=0}^{N-1} (I - \alpha \nabla_w^2 L_{\mathcal{S}_i}(w_m^i(w_1, \phi_1), \phi_1)) \nabla_w L_{\mathcal{D}_i}(w_N^i(w_1, \phi_1), \phi_1) \right. \\ & \quad \left. - \prod_{m=0}^{N-1} (I - \alpha \nabla_w^2 L_{\mathcal{S}_i}(w_m^i(w_2, \phi_2), \phi_2)) \nabla_w L_{\mathcal{D}_i}(w_N^i(w_2, \phi_2), \phi_2) \right\|, \end{aligned} \quad (42)$$

where  $w_m^i(w, \phi)$  is obtained through the gradient descent steps in eq. (12).

Using the triangle inequality in eq. (42) yields

$$\begin{aligned} & \left\| \frac{\partial L_{\mathcal{D}_i}(w_N^i, \phi)}{\partial w} \Big|_{(w_1, \phi_1)} - \frac{\partial L_{\mathcal{D}_i}(w_N^i, \phi)}{\partial w} \Big|_{(w_2, \phi_2)} \right\| \\ &\leq \left\| \prod_{m=0}^{N-1} (I - \alpha \nabla_w^2 L_{\mathcal{S}_i}(w_m^i(w_2, \phi_2), \phi_2)) \right\| \left\| \nabla_w L_{\mathcal{D}_i}(w_N^i(w_1, \phi_1), \phi_1) - \nabla_w L_{\mathcal{D}_i}(w_N^i(w_2, \phi_2), \phi_2) \right\| \\ & \quad + \left\| \prod_{m=0}^{N-1} (I - \alpha \nabla_w^2 L_{\mathcal{S}_i}(w_m^i(w_1, \phi_1), \phi_1)) \nabla_w L_{\mathcal{D}_i}(w_N^i(w_1, \phi_1), \phi_1) \right. \\ & \quad \left. - \prod_{m=0}^{N-1} (I - \alpha \nabla_w^2 L_{\mathcal{S}_i}(w_m^i(w_2, \phi_2), \phi_2)) \nabla_w L_{\mathcal{D}_i}(w_N^i(w_1, \phi_1), \phi_1) \right\|. \end{aligned} \quad (43)$$

Our next two steps are to upper-bound the two terms at the right hand side of eq. (43), respectively.

Step 1: Upper-bound the first term at the right hand side of eq. (43).

$$\begin{aligned} & \left\| \prod_{m=0}^{N-1} (I - \alpha \nabla_w^2 L_{\mathcal{S}_i}(w_m^i(w_2, \phi_2), \phi_2)) \right\| \left\| \nabla_w L_{\mathcal{D}_i}(w_N^i(w_1, \phi_1), \phi_1) - \nabla_w L_{\mathcal{D}_i}(w_N^i(w_2, \phi_2), \phi_2) \right\| \\ &\stackrel{(i)}{\leq} (1 + \alpha L)^N \left\| \nabla_w L_{\mathcal{D}_i}(w_N^i(w_1, \phi_1), \phi_1) - \nabla_w L_{\mathcal{D}_i}(w_N^i(w_2, \phi_2), \phi_2) \right\| \\ &\stackrel{(ii)}{\leq} (1 + \alpha L)^N L (\|w_N^i(w_1, \phi_1) - w_N^i(w_2, \phi_2)\| + \|\phi_1 - \phi_2\|), \end{aligned} \quad (44)$$

where (i) follows from the fact that  $\|\nabla_w^2 L_{\mathcal{S}_i}(w_m^i(w_2, \phi_2), \phi_2)\| \leq L$ , and (ii) follows from Assumption 1. Based on the gradient descent steps in eq. (12), we have, for any  $0 \leq m \leq N - 1$ ,

$$\begin{aligned} & w_{m+1}^i(w_1, \phi_1) - w_{m+1}^i(w_2, \phi_2) \\ &= w_m^i(w_1, \phi_1) - w_m^i(w_2, \phi_2) - \alpha (\nabla_w L_{\mathcal{S}_i}(w_m^i(w_1, \phi_1), \phi_1) - \nabla_w L_{\mathcal{S}_i}(w_m^i(w_2, \phi_2), \phi_2)). \end{aligned}$$

Based on the above equality, we further obtain

$$\begin{aligned} \|w_{m+1}^i(w_1, \phi_1) - w_{m+1}^i(w_2, \phi_2)\| &\leq \|w_m^i(w_1, \phi_1) - w_m^i(w_2, \phi_2)\| \\ &\quad + \alpha \|\nabla_w L_{\mathcal{S}_i}(w_m^i(w_1, \phi_1), \phi_1) - \nabla_w L_{\mathcal{S}_i}(w_m^i(w_2, \phi_2), \phi_2)\| \\ &\leq (1 + \alpha L) \|w_m^i(w_1, \phi_1) - w_m^i(w_2, \phi_2)\| + \alpha L \|\phi_1 - \phi_2\|, \end{aligned}$$

where the last inequality follows from Assumption 1. Telescoping the above inequality over  $m$  from 0 to  $N - 1$  yields

$$\|w_N^i(w_1, \phi_1) - w_N^i(w_2, \phi_2)\| \leq (1 + \alpha L)^N \|w_1 - w_2\| + ((1 + \alpha L)^N - 1) \|\phi_1 - \phi_2\|. \quad (45)$$

Combining eq. (44) and eq. (45) yields

$$\begin{aligned} &\left\| \prod_{m=0}^{N-1} (I - \alpha \nabla_w^2 L_{\mathcal{S}_i}(w_m^i(w_2, \phi_2), \phi_2)) \right\| \left\| \nabla_w L_{\mathcal{D}_i}(w_N^i(w_1, \phi_1), \phi_1) - \nabla_w L_{\mathcal{D}_i}(w_N^i(w_2, \phi_2), \phi_2) \right\| \\ &\leq (1 + \alpha L)^{2N} L (\|w_1 - w_2\| + \|\phi_1 - \phi_2\|). \end{aligned} \quad (46)$$

Step 2: Upper-bound the second term at the right hand side of eq. (43).

Based on item 2 in Assumption 1, we have that  $\|\nabla_w L_{\mathcal{D}_i}(\cdot, \cdot)\| \leq M$ . Then, the second term at the right hand side of eq. (43) is further upper-bounded by

$$M \left\| \underbrace{\prod_{m=0}^{N-1} (I - \alpha \nabla_w^2 L_{\mathcal{S}_i}(w_m^i(w_1, \phi_1), \phi_1)) - \prod_{m=0}^{N-1} (I - \alpha \nabla_w^2 L_{\mathcal{S}_i}(w_m^i(w_2, \phi_2), \phi_2))}_{P_{N-1}} \right\|. \quad (47)$$

In order to upper-bound  $P_{N-1}$  in eq. (47), we define a more general quantity  $P_t$  by replacing  $N - 1$  with  $t$  in eq. (47). Based on the triangle inequality, we have

$$\begin{aligned} P_t &\leq \alpha \left\| \prod_{m=0}^{t-1} (I - \alpha \nabla_w^2 L_{\mathcal{S}_i}(w_m^i(w_1, \phi_1), \phi_1)) \right\| \left\| \nabla_w^2 L_{\mathcal{S}_i}(w_t^i(w_1, \phi_1), \phi_1) - \nabla_w^2 L_{\mathcal{S}_i}(w_t^i(w_2, \phi_2), \phi_2) \right\| \\ &\quad + P_{t-1} \left\| I - \alpha \nabla_w^2 L_{\mathcal{S}_i}(w_t^i(w_2, \phi_2), \phi_2) \right\| \\ &\leq \alpha (1 + \alpha L)^t \rho (\|w_t^i(w_1, \phi_1) - w_t^i(w_2, \phi_2)\| + \|\phi_1 - \phi_2\|) + (1 + \alpha L) P_{t-1} \\ &\stackrel{(i)}{\leq} \alpha \rho (1 + \alpha L)^{2t} (\|w_1 - w_2\| + \|\phi_1 - \phi_2\|) + (1 + \alpha L) P_{t-1}, \end{aligned}$$

where (i) follows from eq. (45). Rearranging the above inequality, we have

$$\begin{aligned} P_t - \frac{\rho}{L} (1 + \alpha L)^{2t+1} (\|w_1 - w_2\| + \|\phi_1 - \phi_2\|) \\ \leq (1 + \alpha L) (P_{t-1} - \frac{\rho}{L} (1 + \alpha L)^{2t-1} (\|w_1 - w_2\| + \|\phi_1 - \phi_2\|)). \end{aligned} \quad (48)$$

Telescoping eq. (48) over  $t$  from 1 to  $N - 1$  yields

$$\begin{aligned} P_{N-1} - \frac{\rho}{L} (1 + \alpha L)^{2N-1} (\|w_1 - w_2\| + \|\phi_1 - \phi_2\|) \\ \leq (1 + \alpha L)^N \left( P_0 - \frac{\rho}{L} (1 + \alpha L) (\|w_1 - w_2\| + \|\phi_1 - \phi_2\|) \right), \end{aligned}$$

which, in conjunction with  $P_0 = \alpha \|\nabla_w^2 L_{\mathcal{S}_i}(w_1, \phi_1) - \nabla_w^2 L_{\mathcal{S}_i}(w_2, \phi_2)\| \leq \alpha \rho (\|w_1 - w_2\| + \|\phi_1 - \phi_2\|)$ , yields

$$\begin{aligned} P_{N-1} - \frac{\rho}{L} (1 + \alpha L)^{2N-1} (\|w_1 - w_2\| + \|\phi_1 - \phi_2\|) \\ \leq (1 + \alpha L)^N \left( \frac{\rho}{L} (\|w_1 - w_2\| + \|\phi_1 - \phi_2\|) \right) \\ \leq \frac{\rho}{L} (1 + \alpha L)^{2N-1} (\|w_1 - w_2\| + \|\phi_1 - \phi_2\|), \end{aligned} \quad (49)$$

where the last inequality follows because  $N \geq 1$ . Combining eq. (47), and eq. (49), we have that the second term at the right hand side of eq. (43) is upper-bounded by

$$\frac{2M\rho}{L}(1 + \alpha L)^{2N-1}(\|w_1 - w_2\| + \|\phi_1 - \phi_2\|). \quad (50)$$

Step 3: Combine two bounds in Steps 1 and 2.

Combining eq. (46), eq. (50), and using  $\alpha < \mathcal{O}(\frac{1}{N})$ , we have

$$\begin{aligned} & \left\| \frac{\partial L_{\mathcal{D}_i}(w_N^i, \phi)}{\partial w} \Big|_{(w_1, \phi_1)} - \frac{\partial L_{\mathcal{D}_i}(w_N^i, \phi)}{\partial w} \Big|_{(w_2, \phi_2)} \right\| \\ & \leq \left(1 + \alpha L + \frac{2M\rho}{L}\right)(1 + \alpha L)^{2N-1}L(\|w_1 - w_2\| + \|\phi_1 - \phi_2\|) \\ & \leq \text{poly}(M, \rho, \alpha, L)N(\|w_1 - w_2\| + \|\phi_1 - \phi_2\|), \end{aligned} \quad (51)$$

which, using an approach similar to eq. (18), completes the proof of the first item in Proposition 3.

We next prove the Lipschitz property of the partial gradient  $\frac{\partial L_{\mathcal{D}_i}(w_N^i, \phi)}{\partial \phi}$ . Using an approach similar to eq. (21) and eq. (22), we have

$$\begin{aligned} & \left\| \frac{\partial L_{\mathcal{D}_i}(w_N^i, \phi)}{\partial \phi} \Big|_{(w_1, \phi_1)} - \frac{\partial L_{\mathcal{D}_i}(w_N^i, \phi)}{\partial \phi} \Big|_{(w_2, \phi_2)} \right\| \\ & \leq \alpha \sum_{m=0}^{N-1} (R_1 + R_2 + R_3) + \|\nabla_{\phi} L_{\mathcal{D}_i}(w_N^i(w_1, \phi_1), \phi_1) - \nabla_{\phi} L_{\mathcal{D}_i}(w_N^i(w_2, \phi_2), \phi_2)\|, \end{aligned} \quad (52)$$

where  $R_1, R_2$  and  $R_3$  are defined in eq. (22).

To upper-bound  $R_1$  in the above inequality, we have

$$\begin{aligned} R_1 & \stackrel{(i)}{\leq} \tau(\|w_m^i(w_1, \phi_1) - w_m^i(w_2, \phi_2)\| + \|\phi_1 - \phi_2\|)(1 + \alpha L)^{N-m-1}M \\ & \stackrel{(ii)}{\leq} \tau M(1 + \alpha L)^{N-1}(\|w_1 - w_2\| + \|\phi_1 - \phi_2\|), \end{aligned} \quad (53)$$

where (i) follows from Assumptions 1 and 2 and (ii) follows from eq. (45).

For  $R_2$ , using the triangle inequality, we have

$$\begin{aligned} & \|U_m(w_1, \phi_1) - U_m(w_2, \phi_2)\| \\ & \leq \alpha \|\nabla_w^2 L_{\mathcal{S}_i}(w_{m+1}^i(w_1, \phi_1), \phi_1) - \nabla_w^2 L_{\mathcal{S}_i}(w_{m+1}^i(w_2, \phi_2), \phi_2)\| \|U_{m+1}(w_1, \phi_1)\| \\ & \quad + \|I - \alpha \nabla_w^2 L_{\mathcal{S}_i}(w_{m+1}^i(w_1, \phi_1), \phi_1)\| \|U_{m+1}(w_1, \phi_1) - U_{m+1}(w_2, \phi_2)\| \\ & \leq \alpha \rho (1 + \alpha L)^{N-m-2} (\|w_{m+1}^i(w_1, \phi_1) - w_{m+1}^i(w_2, \phi_2)\| + \|\phi_1 - \phi_2\|) \\ & \quad + (1 + \alpha L) \|U_{m+1}(w_1, \phi_1) - U_{m+1}(w_2, \phi_2)\| \\ & \leq \alpha \rho (1 + \alpha L)^{N-1} (\|w_1 - w_2\| + \|\phi_1 - \phi_2\|) \\ & \quad + (1 + \alpha L) \|U_{m+1}(w_1, \phi_1) - U_{m+1}(w_2, \phi_2)\|. \end{aligned} \quad (54)$$

Telescoping the above inequality over  $m$  yields

$$\begin{aligned} & \|U_m(w_1, \phi_1) - U_m(w_2, \phi_2)\| + \frac{\rho}{L}(1 + \alpha L)^{N-1}(\|w_1 - w_2\| + \|\phi_1 - \phi_2\|) \\ & \leq (1 + \alpha L)^{N-m-2} \left( \|U_{N-2}(w_1, \phi_1) - U_{N-2}(w_2, \phi_2)\| + \frac{\rho}{L}(1 + \alpha L)^{N-1}(\|w_1 - w_2\| + \|\phi_1 - \phi_2\|) \right), \end{aligned}$$

which, in conjunction with

$$\begin{aligned} \|U_{N-2}(w_1, \phi_1) - U_{N-2}(w_2, \phi_2)\| & = \alpha \|\nabla_w^2 L_{\mathcal{S}_i}(w_{N-1}^i(w_1, \phi_1), \phi_1) - \nabla_w^2 L_{\mathcal{S}_i}(w_{N-1}^i(w_2, \phi_2), \phi_2)\| \\ & \leq \alpha \rho (1 + \alpha L)^{N-1} (\|w_1 - w_2\| + \|\phi_1 - \phi_2\|), \end{aligned}$$

yields that

$$\begin{aligned} \|U_m(w_1, \phi_1) - U_m(w_2, \phi_2)\| & \leq (\alpha \rho + \frac{\rho}{L})(1 + \alpha L)^{2N-m-3} (\|w_1 - w_2\| + \|\phi_1 - \phi_2\|) \\ & \quad - \frac{\rho}{L}(1 + \alpha L)^{N-1} (\|w_1 - w_2\| + \|\phi_1 - \phi_2\|). \end{aligned} \quad (55)$$

Based on Assumption 1, we have  $\|Q_m(w_2, \phi_2)\| \leq L$  and  $\|V_m(w_1, \phi_1)\| \leq M$ , which, combined with eq. (55) and the definition of  $R_2$  in eq. (22), yields

$$\begin{aligned} R_2 &\leq ML\left(\alpha\rho + \frac{\rho}{L}\right)(1 + \alpha L)^{2N-m-3}(\|w_1 - w_2\| + \|\phi_1 - \phi_2\|) \\ &\quad - M\rho(1 + \alpha L)^{N-1}(\|w_1 - w_2\| + \|\phi_1 - \phi_2\|). \end{aligned} \quad (56)$$

For  $R_3$ , using Assumption 1, we have

$$\begin{aligned} R_3 &\leq L(1 + \alpha L)^{N-m-1}\|\nabla_w L_{\mathcal{D}_i}(w_N^i(w_1, \phi_1), \phi_1) - \nabla_w L_{\mathcal{D}_i}(w_N^i(w_2, \phi_2), \phi_2)\| \\ &\leq L^2(1 + \alpha L)^{2N-m-1}(\|w_1 - w_2\| + \|\phi_1 - \phi_2\|), \end{aligned} \quad (57)$$

where the last inequality follows from eq. (45). Combining eq. (53), eq. (56) and eq. (57) yields

$$\begin{aligned} R_1 + R_2 + R_3 &\leq M(\tau - \rho)(1 + \alpha L)^{N-1}(\|w_1 - w_2\| + \|\phi_1 - \phi_2\|) \\ &\quad + M\rho(1 + \alpha L)^{2N-m-2}(\|w_1 - w_2\| + \|\phi_1 - \phi_2\|) \\ &\quad + L^2(1 + \alpha L)^{2N-m-1}(\|w_1 - w_2\| + \|\phi_1 - \phi_2\|). \end{aligned} \quad (58)$$

Combining eq. (52), eq. (58), and using eq. (45) and  $\alpha < \mathcal{O}(\frac{1}{N})$ , we have

$$\begin{aligned} &\left\| \frac{\partial L_{\mathcal{D}_i}(w_N^i, \phi)}{\partial \phi} \Big|_{(w_1, \phi_1)} - \frac{\partial L_{\mathcal{D}_i}(w_N^i, \phi)}{\partial \phi} \Big|_{(w_2, \phi_2)} \right\| \\ &\leq \left( \alpha M(\tau - \rho)N(1 + \alpha L)^{N-1} + \left( L + \frac{\rho M}{L} \right) (1 + \alpha L)^{2N} \right) (\|w_1 - w_2\| + \|\phi_1 - \phi_2\|) \\ &\leq \text{poly}(M, \rho, \tau, \alpha, L)N(\|w_1 - w_2\| + \|\phi_1 - \phi_2\|), \end{aligned} \quad (59)$$

which, using an approach similar to eq. (18), finishes the proof of the second item in Proposition 3.

## D.2 Proof of Theorem 2

For notational convenience, we define

$$\begin{aligned} g_w^i(k) &= \frac{\partial L_{\mathcal{D}_i}(w_{k,N}^i, \phi_k)}{\partial w_k}, \quad g_\phi^i(k) = \frac{\partial L_{\mathcal{D}_i}(w_{k,N}^i, \phi_k)}{\partial \phi_k}, \\ L_w &= (L + \alpha L^2 + 2M\rho)(1 + \alpha L)^{2N-1}, \\ L_\phi &= \alpha M(\tau - \rho)N(1 + \alpha L)^{N-1} + \left( L + \frac{\rho M}{L} \right) (1 + \alpha L)^{2N}. \end{aligned} \quad (60)$$

Based on the smoothness properties established in eq. (51) and eq. (59) in the proof of Proposition 3, we have

$$\begin{aligned} L^{meta}(w_{k+1}, \phi_k) &\leq L^{meta}(w_k, \phi_k) + \left\langle \frac{\partial L^{meta}(w_k, \phi_k)}{\partial w_k}, w_{k+1} - w_k \right\rangle + \frac{L_w}{2} \|w_{k+1} - w_k\|^2, \\ L^{meta}(w_{k+1}, \phi_{k+1}) &\leq L^{meta}(w_{k+1}, \phi_k) + \left\langle \frac{\partial L^{meta}(w_{k+1}, \phi_k)}{\partial \phi_k}, \phi_{k+1} - \phi_k \right\rangle + \frac{L_\phi}{2} \|\phi_{k+1} - \phi_k\|^2. \end{aligned}$$

Adding the above two inequalities, and using an approach similar to eq. (36), we have

$$\begin{aligned} &L^{meta}(w_{k+1}, \phi_{k+1}) \\ &\leq L^{meta}(w_k, \phi_k) - \left\langle \frac{\partial L^{meta}(w_k, \phi_k)}{\partial w_k}, \frac{\beta_w}{B} \sum_{i \in \mathcal{B}_k} g_w^i(k) \right\rangle + \frac{L_w + L_\phi}{2} \left\| \frac{\beta_w}{B} \sum_{i \in \mathcal{B}_k} g_w^i(k) \right\|^2 \\ &\quad - \left\langle \frac{\partial L^{meta}(w_k, \phi_k)}{\partial \phi_k}, \frac{\beta_\phi}{B} \sum_{i \in \mathcal{B}_k} g_\phi^i(k) \right\rangle + L_\phi \left\| \frac{\beta_\phi}{B} \sum_{i \in \mathcal{B}_k} g_\phi^i(k) \right\|^2. \end{aligned} \quad (61)$$

Let  $\mathbb{E}_k = \mathbb{E}(\cdot | w_k, \phi_k)$ . Then, conditioning on  $w_k, \phi_k$ , taking expectation over eq. (61) and using an approach similar to eq. (37), we have

$$\begin{aligned} \mathbb{E}_k L^{meta}(w_{k+1}, \phi_{k+1}) &\leq L^{meta}(w_k, \phi_k) - \beta_w \left\| \frac{\partial L^{meta}(w_k, \phi_k)}{\partial w_k} \right\|^2 + \frac{(L_w + L_\phi)\beta_w^2}{2B} \mathbb{E}_k \|g_w^i(k)\|^2 \\ &\quad + \frac{L_\phi + L_w}{2} \beta_w^2 \left\| \frac{\partial L^{meta}(w_k, \phi_k)}{\partial w_k} \right\|^2 - \beta_\phi \left\| \frac{\partial L^{meta}(w_k, \phi_k)}{\partial \phi_k} \right\|^2 \\ &\quad + L_\phi \left( \frac{\beta_\phi^2}{B} \mathbb{E}_k \|g_\phi^i(k)\|^2 + \beta_\phi^2 \left\| \frac{\partial L^{meta}(w_k, \phi_k)}{\partial \phi_k} \right\|^2 \right). \end{aligned} \quad (62)$$

Our next step is to upper-bound  $\mathbb{E}_k \|g_w^i(k)\|^2$  and  $\mathbb{E}_k \|g_\phi^i(k)\|^2$  in eq. (62). Based on the definitions of  $g_w^i(k)$  in eq. (60) and Proposition 1, we have

$$\begin{aligned} \mathbb{E}_k \|g_w^i(k)\|^2 &\leq \mathbb{E}_k \left\| \frac{\partial L_{\mathcal{D}_i}(w_{k,N}^i, \phi_k)}{\partial w_k} \right\|^2 = \mathbb{E}_k \left\| \prod_{m=0}^{N-1} (I - \alpha \nabla_w^2 L_{S_i}(w_{k,m}^i, \phi_k)) \nabla_w L_{\mathcal{D}_i}(w_{k,N}^i, \phi_k) \right\|^2 \\ &\leq \mathbb{E}_k (1 + \alpha L)^{2N} M^2 = (1 + \alpha L)^{2N} M^2. \end{aligned} \quad (63)$$

Using an approach similar to eq. (63), we have

$$\begin{aligned} \mathbb{E}_k \|g_\phi^i(k)\|^2 &\leq 2\mathbb{E}_k \left\| \alpha \sum_{m=0}^{N-1} \nabla_\phi \nabla_w L_{S_i}(w_{k,m}^i, \phi_k) \prod_{j=m+1}^{N-1} (I - \alpha \nabla_w^2 L_{S_i}(w_{k,j}^i, \phi_k)) \nabla_w L_{\mathcal{D}_i}(w_{k,N}^i, \phi_k) \right\|^2 \\ &\quad + 2\|\nabla_\phi L_{\mathcal{D}_i}(w_{k,N}^i, \phi_k)\|^2 \\ &\leq 2\alpha^2 L^2 M^2 \mathbb{E}_k \left( \sum_{m=0}^{N-1} (1 + \alpha L)^{N-1-m} \right)^2 + 2M^2 \\ &< 2M^2 (1 + \alpha L)^N - 1)^2 + 2M^2 < 2M^2 (1 + \alpha L)^{2N}. \end{aligned} \quad (64)$$

Substituting eq. (63) and eq. (64) into eq. (62), we have

$$\begin{aligned} \mathbb{E}_k L^{meta}(w_{k+1}, \phi_{k+1}) &\leq L^{meta}(w_k, \phi_k) - \left( \beta_w - \frac{L_w + L_\phi}{2} \beta_w^2 \right) \left\| \frac{\partial L^{meta}(w_k, \phi_k)}{\partial w_k} \right\|^2 \\ &\quad + \frac{(L_w + L_\phi)\beta_w^2}{2B} (1 + \alpha L)^{2N} M^2 - (\beta_\phi - L_\phi \beta_\phi^2) \left\| \frac{\partial L^{meta}(w_k, \phi_k)}{\partial \phi_k} \right\|^2 \\ &\quad + \frac{2L_\phi \beta_\phi^2}{B} (1 + \alpha L)^{2N} M^2. \end{aligned} \quad (65)$$

Set  $\beta_w = \frac{1}{L_w + L_\phi}$  and  $\beta_\phi = \frac{1}{2L_\phi}$ . Then, unconditioning on  $w_k, \phi_k$  in eq. (65), we have

$$\begin{aligned} \mathbb{E} L^{meta}(w_{k+1}, \phi_{k+1}) &\leq \mathbb{E} L^{meta}(w_k, \phi_k) - \frac{\beta_w}{2} \mathbb{E} \left\| \frac{\partial L^{meta}(w_k, \phi_k)}{\partial w_k} \right\|^2 + \frac{\beta_w}{2B} (1 + \alpha L)^{2N} M^2 \\ &\quad - \frac{\beta_\phi}{2} \mathbb{E} \left\| \frac{\partial L^{meta}(w_k, \phi_k)}{\partial \phi_k} \right\|^2 + \frac{\beta_\phi}{B} (1 + \alpha L)^{2N} M^2. \end{aligned}$$

Telescoping the above equality over  $k$  from 0 to  $K - 1$  yields

$$\begin{aligned} &\frac{\beta_w}{2} \frac{1}{K} \sum_{k=0}^{K-1} \mathbb{E} \left\| \frac{\partial L^{meta}(w_k, \phi_k)}{\partial w_k} \right\|^2 + \frac{\beta_\phi}{2} \frac{1}{K} \sum_{k=0}^{K-1} \mathbb{E} \left\| \frac{\partial L^{meta}(w_k, \phi_k)}{\partial \phi_k} \right\|^2 \\ &\leq \frac{L^{meta}(w_0, \phi_0) - \min_{w, \phi} L^{meta}(w, \phi)}{K} + \frac{\beta_w + 2\beta_\phi}{2B} (1 + \alpha L)^{2N} M^2. \end{aligned} \quad (66)$$

Let  $\Delta = L^{meta}(w_0, \phi_0) - \min_{w, \phi} L^{meta}(w, \phi) > 0$  and let  $\xi$  be chosen from  $\{0, \dots, K - 1\}$  uniformly at random. Then, eq. (66) further yields

$$\begin{aligned} \mathbb{E} \left\| \frac{\partial L^{meta}(w_\xi, \phi_\xi)}{\partial w_\xi} \right\|^2 &\leq \frac{2\Delta(L_w + L_\phi)}{K} + \frac{1 + \frac{L_w + L_\phi}{L_\phi}}{B} (1 + \alpha L)^{2N} M^2 \\ \mathbb{E} \left\| \frac{\partial L^{meta}(w_\xi, \phi_\xi)}{\partial \phi_\xi} \right\|^2 &\leq \frac{4\Delta L_\phi}{K} + \frac{2 + \frac{2L_\phi}{L_w + L_\phi}}{B} (1 + \alpha L)^{2N} M^2, \end{aligned}$$

which, in conjunction with the definitions of  $L_w$  and  $L_\phi$  in eq. (60) and using  $\alpha < \mathcal{O}(\frac{1}{N})$ , yields

$$\begin{aligned} \mathbb{E} \left\| \frac{\partial L^{meta}(w_\xi, \phi_\xi)}{\partial w_\xi} \right\|^2 &\leq \mathcal{O}\left(\frac{N}{K} + \frac{N}{B}\right), \\ \mathbb{E} \left\| \frac{\partial L^{meta}(w_\xi, \phi_\xi)}{\partial \phi_\xi} \right\|^2 &\leq \mathcal{O}\left(\frac{N}{K} + \frac{N}{B}\right). \end{aligned} \tag{67}$$

To achieve an  $\epsilon$ -stationary point, i.e.,  $\mathbb{E} \left\| \frac{\partial L^{meta}(w, \phi)}{\partial w} \right\|^2 < \epsilon$ ,  $\mathbb{E} \left\| \frac{\partial L^{meta}(w, \phi)}{\partial \phi} \right\|^2 < \epsilon$ ,  $K$  and  $B$  need to be at most  $\mathcal{O}(N\epsilon^{-2})$ , which, in conjunction with the gradient forms in Proposition 1, completes the complexity results.
